# Supplementary material for: Neutral effects of SGLT2 inhibitors in acute coronary syndromes, peripheral arterial occlusive disease, or ischemic stroke: a meta-analysis of randomized controlled trials
Source: Springer Nature journal article supplement (doi:10.1186/s12933-023-01789-5), 2023-03-13
Supplement: MOESM1 [file 24618038]

### **Additional File 1. Database search algorithm**

("sodium glucose transporter 2 inhibitors"[Pharmacological Action] OR "sodium glucose transporter 2 inhibitors"[MeSH Terms] OR "sodium glucose transporter 2 inhibitors"[All Fields] OR ("sglt2"[All Fields] AND "inhibitors"[All Fields]) OR "sglt2 inhibitors"[All Fields]) AND ("sodium glucose transporter 2 inhibitors"[Pharmacological Action] OR "sodium glucose transporter 2 inhibitors"[MeSH Terms] OR "sodium glucose transporter 2 inhibitors"[All Fields] OR ("sglt2"[All Fields] AND "inhibitors"[All Fields]) OR "sglt2 inhibitors"[All Fields]) AND ("diabetes mellitus, type 2"[MeSH Terms] OR "type 2 diabetes mellitus"[All Fields] OR "type 2 diabetes"[All Fields]) AND ("acute coronary syndrome"[MeSH Terms] OR ("acute"[All Fields] AND "coronary"[All Fields] AND "syndrome"[All Fields]) OR "acute coronary syndrome"[All Fields] OR (("peripheral"[All Fields] OR "peripherally"[All Fields] OR "peripherals"[All Fields] OR " peripheral "[All Fields] OR "peripheric"[All Fields] OR " peripherally "[All Fields]) AND ("arterial occlusive diseases"[MeSH Terms] OR ("arterial"[All Fields] AND "occlusive"[All Fields] AND "diseases"[All Fields]) OR "arterial occlusive diseases"[All Fields] OR ("arterial"[All Fields] AND "occlusive"[All Fields] AND "disease"[All Fields]) OR "arterial occlusive disease"[All Fields])) OR ("ischemic stroke"[ MeSH Terms ] OR ("ischemic"[All Fields] AND "stroke"[All Fields]) OR "ischemic stroke"[All Fields]) OR ("all-cause"[All Fields] AND ("mortality"[MeSH Terms] OR "mortality"[All Fields] OR "mortalities"[All Fields] OR "mortality"[MeSH Subheading])) OR (("cardiovascular system"[ MeSH Terms] OR ("cardiovascular"[All Fields] AND "system"[ All Fields]) OR "cardiovascular system"[All Fields] OR "cardiovascular"[All Fields] OR "cardiovasculars "[All Fields]) AND ("death"[ MeSH Terms] OR "death"[All Fields] OR "deaths "[All Fields]))))
