# Supplementary material for: Neutral effects of SGLT2 inhibitors in acute coronary syndromes, peripheral arterial occlusive disease, or ischemic stroke: a meta-analysis of randomized controlled trials
Source: Springer Nature journal article supplement (doi:10.1186/s12933-023-01789-5), 2023-03-13
Supplement: MOESM2 [file 24618038]

## Additional file 2. Cochrane risk-of-bias tool (RoB2) used to assess the quality of a study

|                               | A | B | C | D | E | F |
|-------------------------------|---|---|---|---|---|---|
| NCT01989754, 2017*            | + | + | + | + | + | + |
| Neal et al., 2015             | + | + | ? | + | + | ? |
| Perkovic et al., 2019         | + | + | + | + | + | + |
| Lavalle-González et al., 2013 | + | + | + | + | + | + |
| Cefalu et al., 2013           | + | + | ? | + | + | ? |
| Rosenstock et al., 2016       | + | + | ? | + | + | ? |
| Bode et al., 2015             | + | + | + | + | + | + |
| Lingvay et al., 2019          | + | + | + | + | + | + |
| NCT01106690, 2013             | + | ? | + | + | ? | ? |
| Yale et al., 2014             | ? | ? | + | + | ? | - |
| Wiviott et al., 2019          | + | + | + | + | + | + |
| R. Henry et al., 2012         | + | + | ? | + | + | ? |
| NCT01137474, 2014             | + | + | + | + | + | + |
| Wilding et al., 2014          | + | + | + | + | + | + |
| Leiter et al., 2014           | + | + | + | + | + | + |
| Cefalu et al., 2015           | + | + | + | + | + | + |
| Strojek et al., 2011*         | + | + | + | + | + | + |
| Bailey et al., 2015           | + | + | ? | + | + | ? |
| Bailey et al., 2013           | + | + | ? | + | + | ? |
| Nauck et al., 2011*           | + | + | + | + | + | + |
| Müller-Wieland et al., 2018** | + | + | + | + | + | + |
| Scott et al., 2018            | + | + | + | + | + | + |
| Fioretto et al., 2018         | + | + | + | + | + | + |
| Yang et al., 2017             | + | ? | ? | + | + | ? |
| Matthaei et al., 2015         | + | ? | ? | + | + | ? |
| Zinman et al., 2015           | + | + | + | + | + | + |
| Roden et al., 2015#           | ? | + | + | + | + | ? |
| Häring et al., 2013           | + | + | + | + | + | + |
| Hadjadj et al., 2016*         | + | + | ? | + | + | + |
| NCT01649297, 2015*            | ? | ? | + | ? | - | - |
| Ridderstråle et al, 2018      | + | + | ? | + | + | ? |
| Ferrannini et al., 2013       | ? | + | + | + | + | ? |
| Barnett et al., 2014          | + | + | + | + | + | + |
| Rodbard et al., 2019*         | + | + | ? | + | + | ? |
| Rosenstock et al., 2014       | + | + | ? | + | + | ? |
| Rosenstock et al., 2015       | + | + | ? | + | + | ? |
| Tanizawa et al., 2015***      | + | + | + | + | + | + |
| Cannon et al., 2020*          | + | + | + | + | + | + |
| Hollander et al., 2019*       | + | + | ? | + | + | ? |
| Pratley et al., 2018**        | + | + | ? | + | + | ? |
| Rosenstock et al., 2018       | + | + | ? | + | + | ? |
| Grunberger et al., 2017       | + | + | + | + | + | + |
| Dagogo-Jack et al., 2017      | + | + | + | + | + | + |

|   |                                                        |
|---|--------------------------------------------------------|
| A | Bias arising from the randomization process            |
| B | Bias due to deviations from the intended interventions |
| C | Bias due to missing outcome data                       |
| D | Bias in measurement of the outcome                     |
| E | Bias in selection of the reported result               |
| F | Overall risk of bias                                   |

|   |                   |
|---|-------------------|
| + | Low risk of bias  |
| ? | Some concerns     |
| - | High risk of bias |
