# Supplementary material for: Neutral effects of SGLT2 inhibitors in acute coronary syndromes, peripheral arterial occlusive disease, or ischemic stroke: a meta-analysis of randomized controlled trials
Source: Springer Nature journal article supplement (doi:10.1186/s12933-023-01789-5), 2023-03-13

### Additional file 3. Summary of overall risk of biases in a study

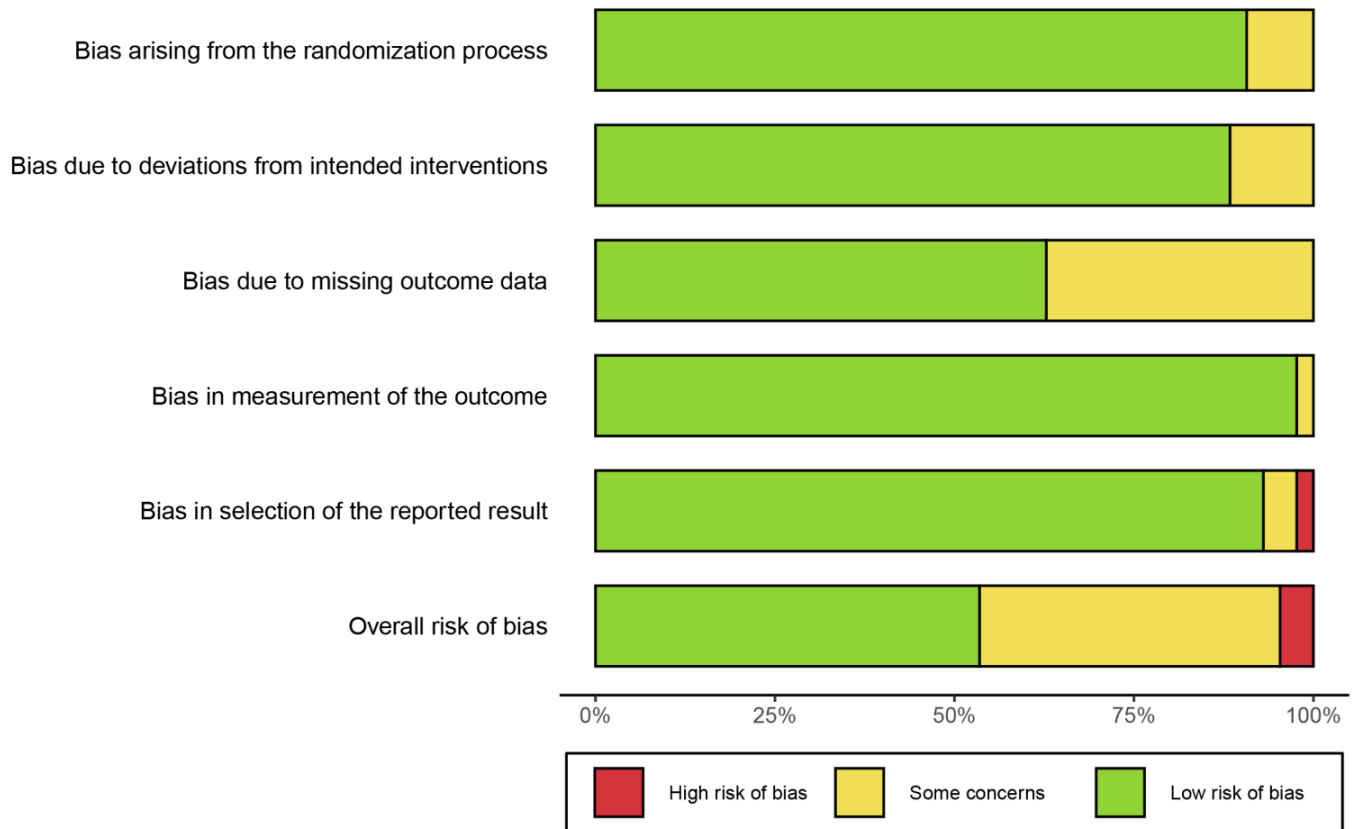

Supplement: MOESM3 [file 24618038]
