# Supplementary material for: Neutral effects of SGLT2 inhibitors in acute coronary syndromes, peripheral arterial occlusive disease, or ischemic stroke: a meta-analysis of randomized controlled trials
Source: Springer Nature journal article supplement (doi:10.1186/s12933-023-01789-5), 2023-03-13
Supplement: MOESM4 [file 24618038]

**Additional file 4. Subgroup analysis of studies separated by the presence or absence of atherosclerotic cardiovascular disease at baseline**

|                                             | SGLT2i |       | Control |       | Risk Ratio*<br>(95% CI) | Heterogeneity<br><i>I</i> <sup>2</sup> | Heterogeneity<br>P-value |
|---------------------------------------------|--------|-------|---------|-------|-------------------------|----------------------------------------|--------------------------|
|                                             | Events | Total | Events  | Total |                         |                                        |                          |
| <b>Acute Coronary Syndrome</b>              |        |       |         |       |                         |                                        |                          |
| Baseline with ASCVD                         | 1116   | 22100 | 827     | 15550 | 0.97 (0.85, 1.10)       | 36%                                    | 0.18                     |
| Baseline w/o ASCVD                          | 184    | 19781 | 185     | 13806 | 0.87 (0.71, 1.07)       | 0%                                     | 0.93                     |
| Overall                                     | 1300   | 41881 | 1012    | 29356 | 0.97 (0.89, 1.05)       | 0%                                     | 0.82                     |
| <b>Ischemic Stroke</b>                      |        |       |         |       |                         |                                        |                          |
| Baseline with ASCVD                         | 210    | 22100 | 158     | 15550 | 0.95 (0.78, 1.17)       | 0%                                     | 0.80                     |
| Baseline w/o ASCVD                          | 47     | 14317 | 42      | 10573 | 0.93 (0.62, 1.41)       | 0%                                     | 0.89                     |
| Overall                                     | 257    | 36417 | 200     | 26123 | 0.95 (0.79, 1.14)       | 0%                                     | 0.96                     |
| <b>Peripheral Artery Occlusive Diseases</b> |        |       |         |       |                         |                                        |                          |
| Baseline with ASCVD                         | 160    | 21640 | 98      | 15088 | 1.08 (0.74, 1.57)       | 46%                                    | 0.13                     |
| Baseline w/o ASCVD                          | 31     | 13332 | 29      | 9892  | 0.85 (0.52, 1.37)       | 0%                                     | 0.99                     |
| Overall                                     | 191    | 34972 | 127     | 24980 | 0.98 (0.78, 1.24)       | 0%                                     | 0.90                     |
| <b>Cardiovascular Death</b>                 |        |       |         |       |                         |                                        |                          |
| Baseline with ASCVD                         | 763    | 19228 | 571     | 14120 | 0.86 (0.65, 1.12)       | 78%                                    | <0.01                    |
| Baseline w/o ASCVD                          | 115    | 14406 | 147     | 9010  | 0.76 (0.60, 0.96)       | 0%                                     | 0.88                     |
| Overall                                     | 878    | 33634 | 718     | 23130 | 0.82 (0.69, 0.97)       | 28%                                    | 0.14                     |
| <b>All-cause Mortality</b>                  |        |       |         |       |                         |                                        |                          |
| Baseline with ASCVD                         | 1292   | 20610 | 1030    | 14810 | 0.86 (0.72, 1.02)       | 66%                                    | 0.02                     |
| Baseline w/o ASCVD                          | 285    | 20551 | 302     | 13911 | 0.86 (0.74, 1.01)       | 0%                                     | 0.93                     |
| Overall                                     | 1577   | 41161 | 1332    | 28721 | 0.87 (0.81, 0.94)       | 0%                                     | 0.60                     |

\*Risk ratios were calculated based on a random effects model.
